# Supplementary material for: Hypercapnia promotes maladaptive airway and vascular remodeling in mice
Source: JCI journal article supplement (doi:10.1172/jci196928), 2025-08-26
Supplement: sd2 [file 2]

# Unedited blot and gel images

For Supplemental Figure 2A:

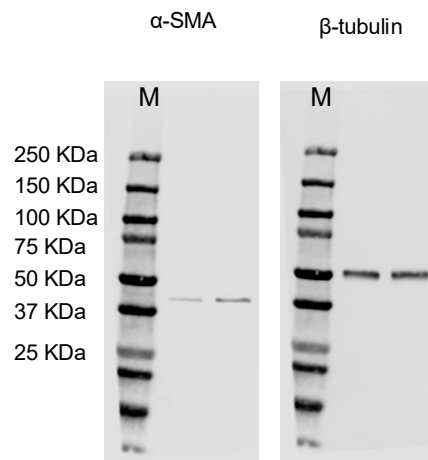

M, protein marker

## For Supplemental Figure 2C:

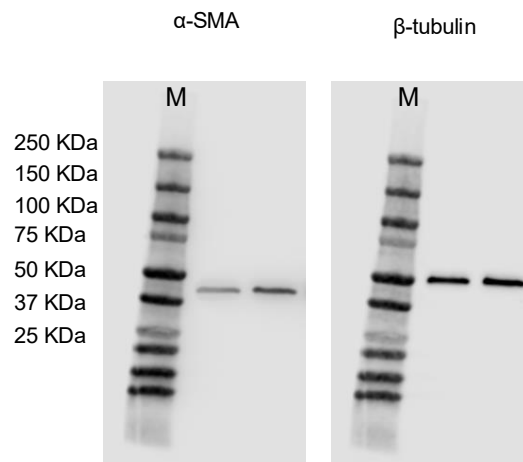

M, protein marker

## For Supplemental Figure 2E:

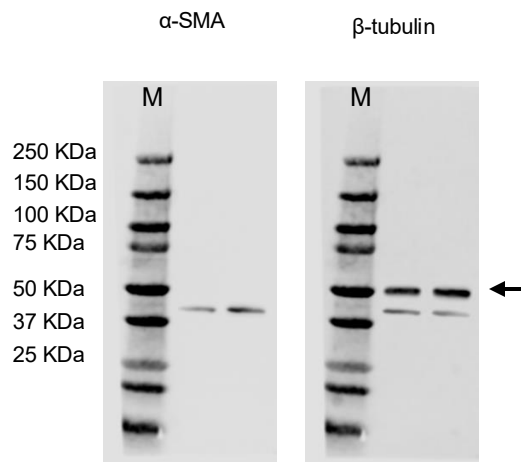

M, protein marker

## For Supplemental Figure 2I:

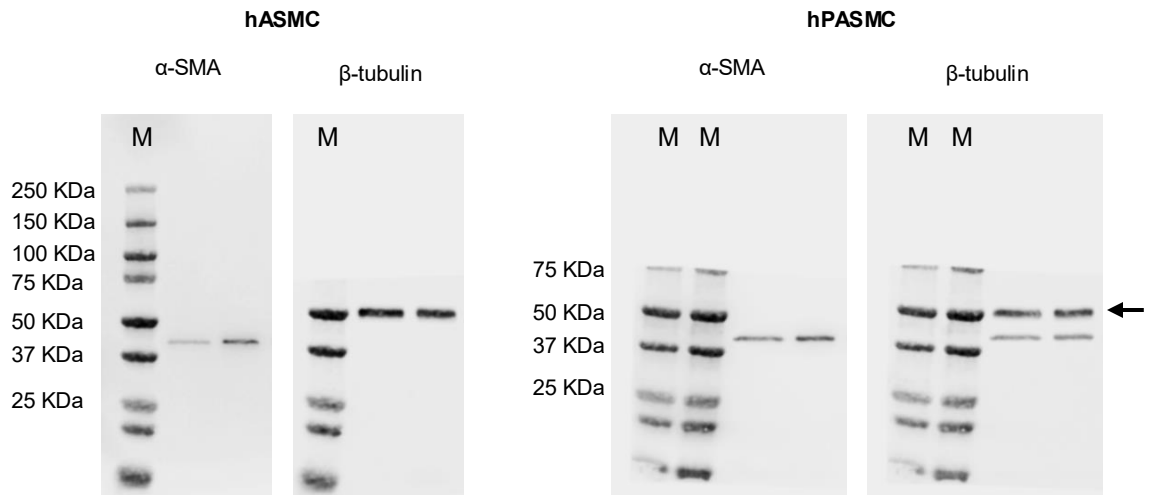

M, protein marker
